# Supplementary material
Source: publisher figshare collection journal article supplement (https://sage.figshare.com/ndownloader/files/14862185)
Supplement: Supplementary file 1 [file 14862185]

## Appendix

**Table A1.** Association of loneliness with work disability onset among non-disabled, working older adults when controlling for lagged work limitations variable

| (Dependent variable =1 if respondent developed work disability at wave 6) | Odds Ratios         |                                                   |                                                             |                                       |
|---------------------------------------------------------------------------|---------------------|---------------------------------------------------|-------------------------------------------------------------|---------------------------------------|
|                                                                           | (1)                 | (2)                                               | (3)                                                         | (4)                                   |
|                                                                           | Basic model         | Extra and intra individual factors + Risk factors | Including pathology, impairment, and functional limitations | Including depression measured in 2015 |
|                                                                           |                     |                                                   |                                                             |                                       |
| Loneliness                                                                | 1.213***<br>(0.051) | 1.263***<br>(0.083)                               | 1.222**<br>(0.084)                                          | 1.173*<br>(0.082)                     |
| Reported work limitation in wave 4                                        | 4.473***<br>(0.533) | 3.671***<br>(0.663)                               | 3.231***<br>(0.596)                                         | 3.199***<br>(0.595)                   |
| Male                                                                      |                     | 1.051<br>(0.164)                                  | 1.090<br>(0.174)                                            | 1.210<br>(0.196)                      |
| Age                                                                       |                     | 1.089***<br>(0.017)                               | 1.080***<br>(0.017)                                         | 1.083***<br>(0.017)                   |
| Higher-education                                                          |                     | 0.586**<br>(0.098)                                | 0.601**<br>(0.101)                                          | 0.612**<br>(0.103)                    |
| Married                                                                   |                     | 1.330<br>(0.238)                                  | 1.327<br>(0.239)                                            | 1.299<br>(0.233)                      |
| Income (log)                                                              |                     | 0.911<br>(0.077)                                  | 0.904<br>(0.078)                                            | 0.907<br>(0.079)                      |
| Physical inactivity                                                       |                     | 1.504<br>(0.590)                                  | 1.455<br>(0.571)                                            | 1.403<br>(0.550)                      |
| Smokes                                                                    |                     | 1.240<br>(0.214)                                  | 1.227<br>(0.213)                                            | 1.235<br>(0.215)                      |
| Alcohol consumption                                                       |                     | 1.048<br>(0.045)                                  | 1.049<br>(0.045)                                            | 1.048<br>(0.045)                      |
| Access difficulties                                                       |                     | 1.039<br>(0.036)                                  | 1.041<br>(0.036)                                            | 1.035<br>(0.036)                      |
| 2+ chronic diseases                                                       |                     |                                                   | 1.853***<br>(0.293)                                         | 1.771***<br>(0.282)                   |

|                                   |      |         |         |          |
|-----------------------------------|------|---------|---------|----------|
| Activities of daily living        |      |         | 1.038   | 1.035    |
|                                   |      |         | (0.257) | (0.264)  |
| Depressed (baseline wave - 2013)  |      |         | 1.124   | 0.809    |
|                                   |      |         | (0.217) | (0.165)  |
| Depressed (follow up wave - 2015) |      |         |         | 2.757*** |
|                                   |      |         |         | (0.479)  |
| Austria                           |      | 1.000   | 1.000   | 1.000    |
|                                   |      | (.)     | (.)     | (.)      |
| Germany                           |      | 0.584   | 0.578   | 0.550    |
|                                   |      | (0.296) | (0.293) | (0.280)  |
| Sweden                            |      | 0.461   | 0.457   | 0.457    |
|                                   |      | (0.233) | (0.232) | (0.232)  |
| Spain                             |      | 0.771   | 0.764   | 0.761    |
|                                   |      | (0.302) | (0.299) | (0.299)  |
| Italy                             |      | 0.476   | 0.457   | 0.417    |
|                                   |      | (0.218) | (0.210) | (0.192)  |
| France                            |      | 0.545   | 0.533   | 0.475    |
|                                   |      | (0.214) | (0.210) | (0.189)  |
| Denmark                           |      | 0.804   | 0.798   | 0.827    |
|                                   |      | (0.300) | (0.299) | (0.311)  |
| Switzerland                       |      | 0.445*  | 0.461*  | 0.448*   |
|                                   |      | (0.172) | (0.178) | (0.173)  |
| Belgium                           |      | 0.996   | 0.936   | 0.879    |
|                                   |      | (0.339) | (0.319) | (0.301)  |
| Czech Republic                    |      | 0.845   | 0.820   | 0.837    |
|                                   |      | (0.303) | (0.295) | (0.302)  |
| Slovenia                          |      | 0.241   | 0.235   | 0.234    |
|                                   |      | (0.184) | (0.180) | (0.179)  |
| Estonia                           |      | 1.007   | 0.978   | 0.903    |
|                                   |      | (0.320) | (0.312) | (0.290)  |
| N                                 | 5767 | 5767    | 5767    | 5767     |

*Note:* Logistic regression results with coefficients transformed to odds ratios. Standard error in parentheses. \*p<.05 \*\*p<.01 \*\*\*p<.001. Analysis conducted on the subset of the analytical sample interviewed at waves 4, 5, and 6. N= 5,767. Model controls for lagged work limitation variable.

**Table A2.** Association of loneliness with work disability onset among non-disabled, working older adults when no reported work-limitation in prior two waves

| (Dependent variable =1 if respondent developed work disability at wave 6) | Odds Ratios |                                                   |                                                             |                                       |
|---------------------------------------------------------------------------|-------------|---------------------------------------------------|-------------------------------------------------------------|---------------------------------------|
|                                                                           | (1)         | (2)                                               | (3)                                                         | (4)                                   |
|                                                                           | Basic model | Extra and intra individual factors + Risk factors | Including pathology, impairment, and functional limitations | Including depression measured in 2015 |
|                                                                           |             |                                                   |                                                             |                                       |
| Loneliness                                                                | 1.235***    | 1.293***                                          | 1.202*                                                      | 1.151                                 |
|                                                                           | (0.057)     | (0.099)                                           | (0.098)                                                     | (0.095)                               |
| Male                                                                      |             | 0.950                                             | 0.994                                                       | 1.084                                 |
|                                                                           |             | (0.168)                                           | (0.180)                                                     | (0.198)                               |
| Age                                                                       |             | 1.090***                                          | 1.081***                                                    | 1.083***                              |
|                                                                           |             | (0.019)                                           | (0.019)                                                     | (0.020)                               |
| Higher-education                                                          |             | 0.606**                                           | 0.626*                                                      | 0.625*                                |
|                                                                           |             | (0.113)                                           | (0.117)                                                     | (0.118)                               |
| Married                                                                   |             | 1.432                                             | 1.429                                                       | 1.384                                 |
|                                                                           |             | (0.300)                                           | (0.300)                                                     | (0.290)                               |
| Income (log)                                                              |             | 0.910                                             | 0.898                                                       | 0.910                                 |
|                                                                           |             | (0.088)                                           | (0.089)                                                     | (0.092)                               |
| Physical inactivity                                                       |             | 1.509                                             | 1.347                                                       | 1.253                                 |
|                                                                           |             | (0.669)                                           | (0.603)                                                     | (0.566)                               |
| Smokes                                                                    |             | 1.110                                             | 1.104                                                       | 1.097                                 |
|                                                                           |             | (0.222)                                           | (0.222)                                                     | (0.221)                               |
| Alcohol consumption                                                       |             | 1.007                                             | 1.003                                                       | 1.005                                 |
|                                                                           |             | (0.048)                                           | (0.048)                                                     | (0.048)                               |
| Access difficulties                                                       |             | 1.069                                             | 1.072                                                       | 1.071                                 |
|                                                                           |             | (0.041)                                           | (0.041)                                                     | (0.041)                               |
| 2+ chronic diseases                                                       |             |                                                   | 1.920***                                                    | 1.824***                              |
|                                                                           |             |                                                   | (0.347)                                                     | (0.332)                               |
| Activities of daily living                                                |             |                                                   | 1.369                                                       | 1.349                                 |
|                                                                           |             |                                                   | (0.360)                                                     | (0.365)                               |
| Depressed (baseline wave - 2013)                                          |             |                                                   | 1.369                                                       | 0.978                                 |
|                                                                           |             |                                                   | (0.297)                                                     | (0.226)                               |

|                                   |         |         |         |          |
|-----------------------------------|---------|---------|---------|----------|
| Depressed (follow up wave - 2015) |         |         |         | 2.709*** |
|                                   |         |         |         | (0.537)  |
| Austria                           | 1.000   | 1.000   | 1.000   | 1.000    |
|                                   | (.)     | (.)     | (.)     | (.)      |
| Germany                           | 0.564   | 0.554   | 0.523   | 0.564    |
|                                   | (0.302) | (0.298) | (0.283) | (0.302)  |
| Sweden                            | 0.398   | 0.398   | 0.404   | 0.398    |
|                                   | (0.202) | (0.204) | (0.208) | (0.202)  |
| Spain                             | 0.760   | 0.754   | 0.777   | 0.760    |
|                                   | (0.304) | (0.302) | (0.313) | (0.304)  |
| Italy                             | 0.363*  | 0.336*  | 0.314*  | 0.363*   |
|                                   | (0.174) | (0.163) | (0.153) | (0.174)  |
| France                            | 0.193** | 0.194** | 0.176** | 0.193**  |
|                                   | (0.102) | (0.102) | (0.093) | (0.102)  |
| Denmark                           | 0.517   | 0.529   | 0.557   | 0.517    |
|                                   | (0.208) | (0.213) | (0.225) | (0.208)  |
| Switzerland                       | 0.294** | 0.311** | 0.309** | 0.294**  |
|                                   | (0.120) | (0.127) | (0.126) | (0.120)  |
| Belgium                           | 0.684   | 0.640   | 0.607   | 0.684    |
|                                   | (0.245) | (0.230) | (0.219) | (0.245)  |
| Czech Republic                    | 0.560   | 0.558   | 0.582   | 0.560    |
|                                   | (0.217) | (0.217) | (0.227) | (0.217)  |
| Slovenia                          | 0.238   | 0.240   | 0.236   | 0.238    |
|                                   | (0.181) | (0.183) | (0.180) | (0.181)  |
| Estonia                           | 0.712   | 0.706   | 0.662   | 0.712    |
|                                   | (0.237) | (0.236) | (0.224) | (0.237)  |
| N                                 | 5339    | 5339    | 5339    | 5339     |

*Note:* Logistic regression results with coefficients transformed to odds ratios. Standard error in parentheses. \*p<.05 \*\*p<.01 \*\*\*p<.001. Analysis conducted on the subset of the analytical sample interviewed at waves 4, 5, and 6. N= 5,339. Model does not include respondents who reported work limitations in waves 4 or 5.

**Table A3.** Mediation results with lagged work limitations variable

|                                        | Coefficient | Bootstrapped<br>Standard Error | P> z  | 95% CI |       |
|----------------------------------------|-------------|--------------------------------|-------|--------|-------|
| Indirect effect                        | 0.028       | 0.006                          | 0.000 | 0.016  | 0.040 |
| Direct effect                          | 0.076       | 0.033                          | 0.022 | 0.011  | 0.142 |
| Total effect                           | 0.105       | 0.034                          | 0.002 | 0.039  | 0.171 |
| Proportion of total effect<br>mediated | 27%         |                                |       |        |       |

*Note:* Standardized coefficients calculated with the binary mediation command in Stata. Bootstrapped standard errors with 5,000 replications. CI = Confidence Intervals. Analysis conducted on the subset of sample interviewed at waves 4, 5, and 6. N= 5,767. Model controls for lagged work limitation variable.

**Table A4.** Mediation results conducted when no reported work-limitation in prior two waves

|                                        | Coefficient | Bootstrapped<br>Standard Error | P> z  | 95% CI |      |
|----------------------------------------|-------------|--------------------------------|-------|--------|------|
| Indirect effect                        | .027        | .007                           | 0.000 | .013   | .041 |
| Direct effect                          | .065        | .040                           | 0.101 | -.013  | .144 |
| Total effect                           | .092        | .040                           | 0.022 | .014   | .171 |
| Proportion of total effect<br>mediated | 29%         |                                |       |        |      |

*Note:* Standardized coefficients calculated with the binary mediation command in Stata. Bootstrapped standard errors with 5,000 replications. CI = Confidence Intervals. Analysis conducted on the subset of sample interviewed at waves 4, 5, and 6. N= 5,339. Model does not include respondents who reported work limitations in waves 4 and 5.

**Figure A1.** Model of the association of loneliness, depression, and work disability including lagged work limitations variable

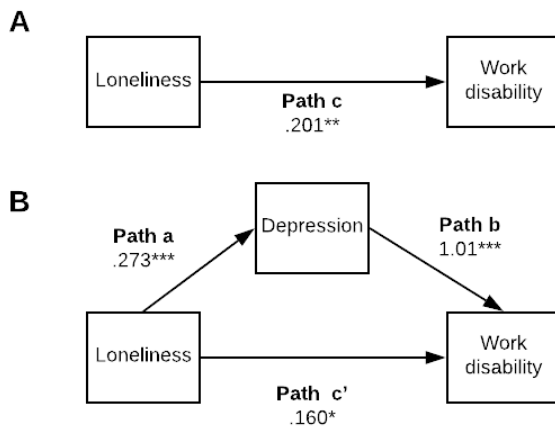

*Note:* Logistic regression coefficients are unstandardized. Results come from separate logistic regression equations and control for the full set of covariates displayed in Table A1 models 3 and 4 and includes the lagged work limitation variable in all models. \* $p < .05$  \*\* $p < .01$  \*\*\* $p < .001$

**Figure A2.** Model of the association of loneliness, depression, and work disability when no reported work-limitation in prior two waves

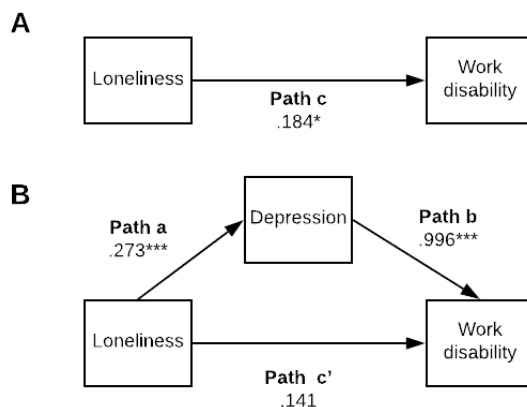

*Note:* Logistic regression coefficients are unstandardized. Results come from separate logistic regression equations and control for the full set of covariates displayed in Table A2 models 3 and 4 and includes the lagged work limitation variable in all models. \* $p < .05$  \*\* $p < .01$  \*\*\* $p < .001$
